# Supplementary material
Source: PubMed Central journal article supplement (PMC2729600)
Supplement: tpc.109.067736_1.pdf [file tpc.109.067736_1.pdf]

Supplemental Data. Kim et al. (2009) Aberrant mRNA transcripts and the nonsense-mediated decay proteins UPF2 and UPF3 are enriched in the Arabidopsis nucleolus

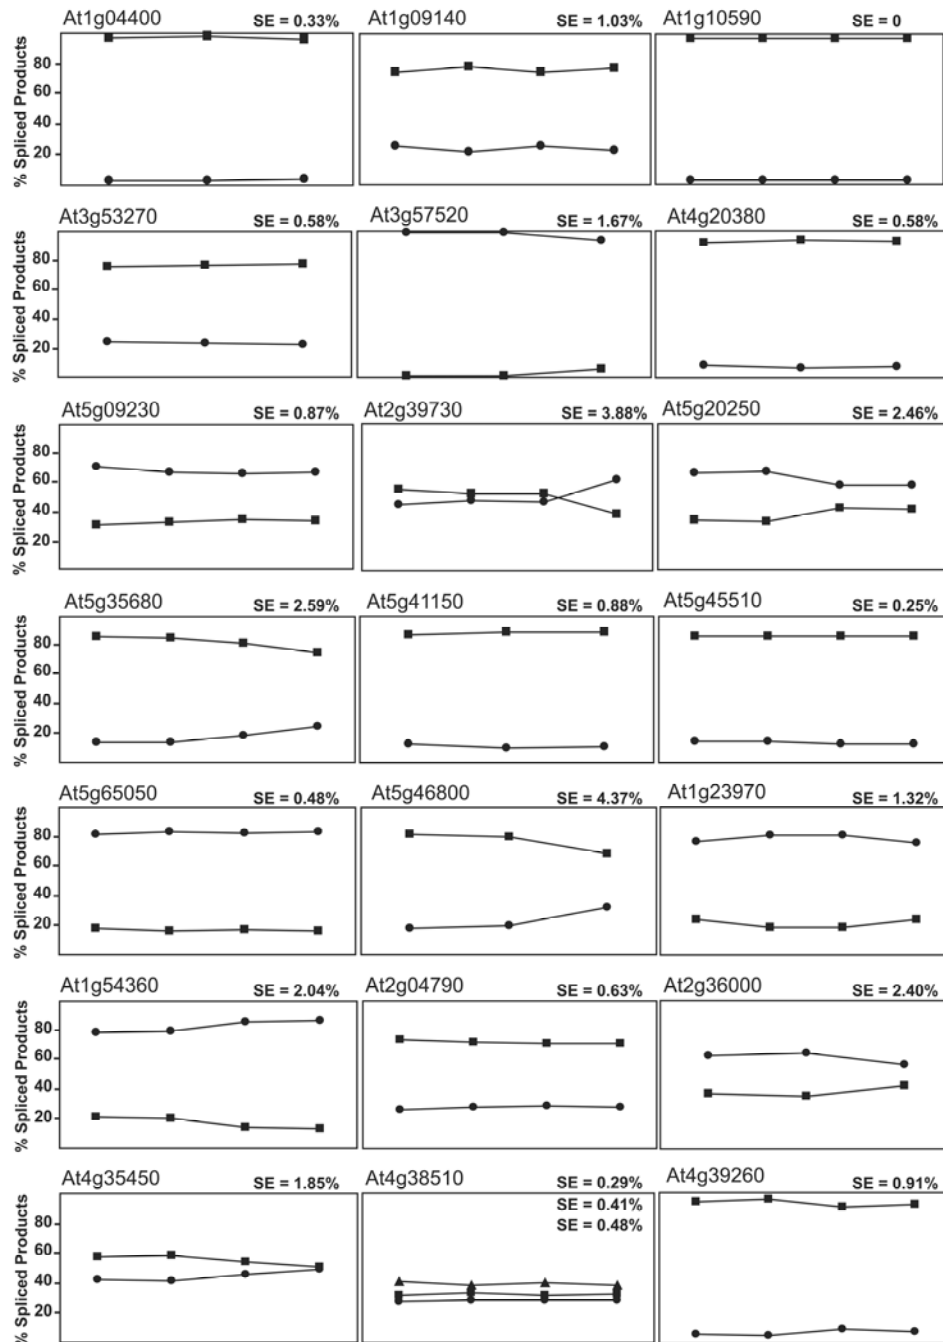

**Supplemental Figure 1. RT-PCR conditions for comparison of relative abundance of aberrant and fully spliced mRNAs.** Mean percentage abundance (3 experiments) of alternatively spliced transcripts are measured across different PCR cycle times (22, 24, 26 cycles or 20, 22, 24, 26 cycles).

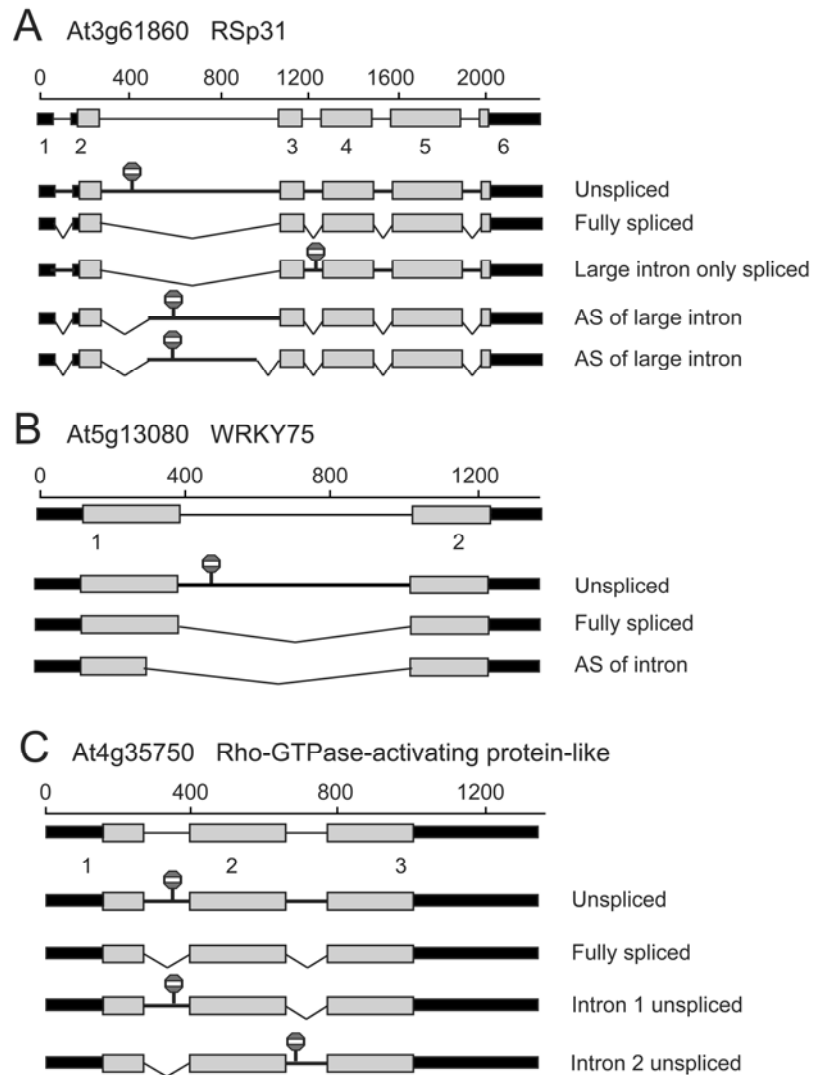

**Supplemental Figure 2. Aberrantly spliced transcripts sequenced from RT-PCR reactions.** Examples of cloned and sequenced transcripts are presented with descriptions for three genes: (A) At3g61860; (B) At5g13080; (C) At4g35750. Black boxes – UTRs; grey boxes – exons; black lines – intron sequences remaining in transcripts; diagonal lines – intron sequences removed from transcript; stop sign – premature termination codon.

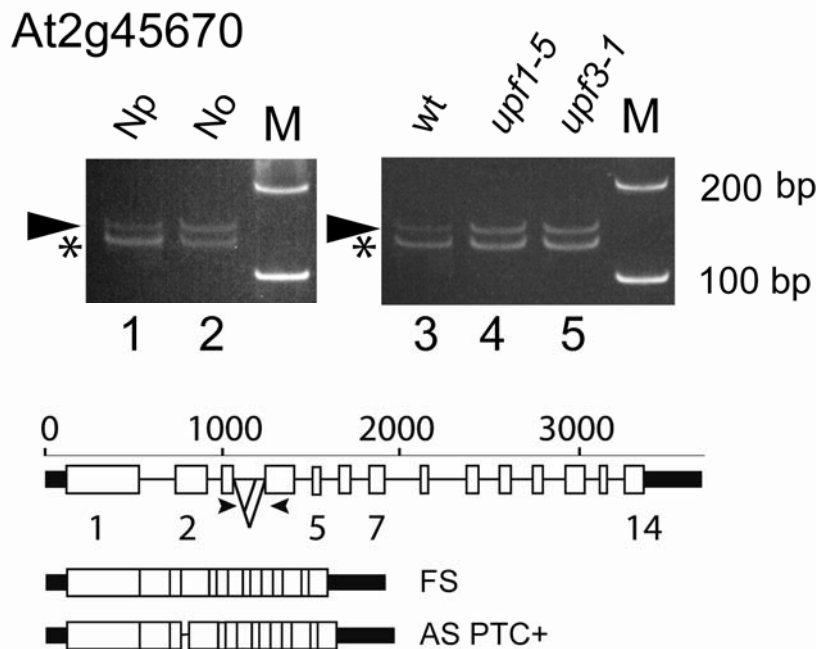

**Supplemental Figure 3. RT-PCR of mRNA transcripts of At2g45670 in nucleoplasmic and nucleolar RNA and RNA from *upf* mutants.** RT-PCR with gene-specific primers for At2g45670 from RNA from nucleoplasmic (Np) and nucleolar (No) fractions of cell culture cells (lanes 1 and 2), and seedlings of wild type plants (lane 3), *upf1-5* (lane 4) and *upf3-1* (lane 5). Transcript structures are shown below the exon/intron structure of the genes based on TAIR. M – size markers; large arrowheads – RT-PCR products which are enriched in the nucleolus and in *upf* mutants; asterisk – fully spliced product; open boxes – exons; thick black lines – UTRs; solid lines – introns; diagonal lines – splicing events; small arrowheads – primer positions. RT-PCR controls without reverse transcriptase are not shown.

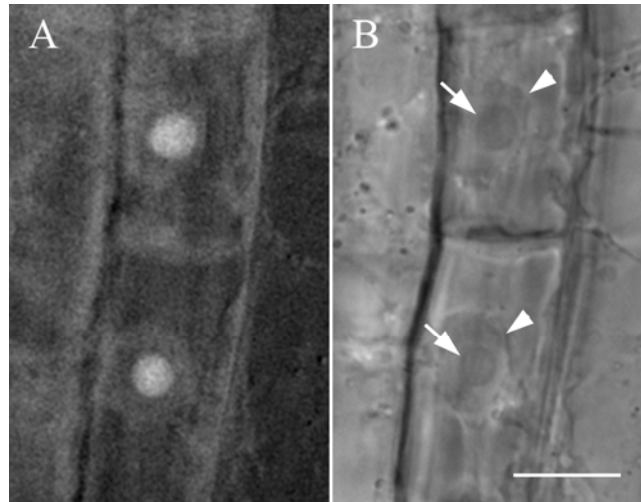

**Supplemental Figure 4. Root epidermal cells from 5 day-old Arabidopsis seedling stably transformed with UPF-GFP.** Root epidermal cells from 5 day-old Arabidopsis seedling stably transformed with upf-GFP. **(A)** GFP image, showing UPF3-GFP concentrated in the nucleoli. Deconvoluted wide-field fluorescence image. **(B)** bright field image of the same area. Nucleoli are indicated by arrows and nuclei by arrowheads. Bar=5 $\mu$ m.

**Supplemental Table 1.** Aberrant cDNA clones from nucleolar, nuclear and whole cell cDNA libraries.

| Clone number                       | At number | Arabidopsis gene function (TAIR)                     | Exon No. | Mis-splicing type                                    | Predicted fate of transcript | Known alternative splicing events                                                          |
|------------------------------------|-----------|------------------------------------------------------|----------|------------------------------------------------------|------------------------------|--------------------------------------------------------------------------------------------|
| <b>Nucleolar full-length cDNAs</b> |           |                                                      |          |                                                      |                              |                                                                                            |
| AtNo071                            | At1g14870 | Expressed protein                                    | 4        | Introns 1 and 3 unspliced                            | NMD                          | Intron retention of intron 2 - ASIP database                                               |
| AtNo103                            | At1g19570 | GSH-dependent dehydroascorbate reductase 1, putative | 3        | Intron 2 unspliced                                   | Last intron unspliced        | Intron retention of intron 1 and intron 2 - ASIP database                                  |
| AtNo144                            | At1g25275 | Expressed protein                                    | 3        | Introns 1 and 2 unspliced                            | NMD                          | Intron retention of intron 1 and intron 2 - ASIP database                                  |
| AtNo155                            | At1g32220 | Expressed protein                                    | 7        | Intron 1 unspliced                                   | NMD                          | x                                                                                          |
| AtNo123                            | At1g49405 | Integral membrane protein                            | 3        | Intron 2 unspliced                                   | Last intron unspliced        | x                                                                                          |
| AtNo1318                           | At1g54260 | Histone H5/H1 family protein                         | 7        | Cryptic 5'ss in intron 4                             | NMD                          | x                                                                                          |
| AtNo317                            | At1g54260 | Histone H1/H5 family protein                         | 7        | Intron 4 unspliced                                   | NMD                          | x                                                                                          |
| AtNo028                            | At1g60030 | Xanthine/uracil permease family protein              | 13       | Intron 1 unspliced                                   | NMD                          | x                                                                                          |
| AtNo1336                           | At1g61570 | Mitochondrial import inner membrane translocase      | 2        | Intron 1 unspliced                                   | Only intron                  | x                                                                                          |
| AtNo029                            | At1g63290 | Ribulose-phosphate 3-epimerase                       | 8        | Introns 3 and 5 unspliced                            | NMD                          | x                                                                                          |
| AtNo159                            | At1g66580 | 60S ribosomal protein L10                            | 4        | Intron 3 unspliced                                   | Last intron unspliced        | x                                                                                          |
| AtNo056                            | At1g67980 | S-adenosyl-L-methionine:trans-caffeoyl-Coenzyme A    | 5        | Introns 2 and 3 unspliced; cryptic 3' ss in intron 4 | NMD                          | Intron retention of intron 3 (ASIP database) and Alt 5'ss used in intron 3 (ASIP and NASC) |
| AtNo1413                           | At1g70440 | Hypothetical protein                                 | 4        | Intron 1 unspliced                                   | NMD                          | x                                                                                          |
| AtNo239                            | At1g70780 | Expressed protein                                    | 2        | Intron 1 unspliced                                   | Only intron                  | Intron retention of intron 1 - ASIP database                                               |
| AtNo164                            | At1g72640 | Expressed protein                                    | 9        | Cryptic 3' splice sites in exons 3 and 7             | NMD                          | Alt 3'ss used in intron 2 (3nt distance only) - ASIP and NASC                              |

|          |           |                                                 |    |                                    |                       |                                                                                                                                           |
|----------|-----------|-------------------------------------------------|----|------------------------------------|-----------------------|-------------------------------------------------------------------------------------------------------------------------------------------|
| AtNo069  | At1g80840 | WRKY family transcription factor 40             | 4  | Introns 1 and 2 unspliced          | NMD                   | x                                                                                                                                         |
| AtNo194  | At2g01540 | Zinc finger and C2 domain containing protein    | 3  | Intron 1 unspliced                 | NMD                   | x                                                                                                                                         |
| AtNo130  | At2g02100 | Defensin fusion protein, putative               | 2  | Intron 1 unspliced                 | Only intron           | x                                                                                                                                         |
| AtNo1418 | At2g02390 | Glutathione S-transferase zeta 1                | 10 | Cryptic 3' ss in intron 3          | 21 nt in frame        | Alt 3'ss used in intron 3 (distance 21 nt) - ASIP and NASC ; Intron retention of intron 4 - ASIP+NASC                                     |
| AtNo283  | At2g16060 | Non-symbiotic hemoglobin 1                      | 4  | Introns 2 and 3 unspliced          | NMD                   | Intron retention of intron 1 and intron 2 - ASIP database                                                                                 |
| AtNo1427 | At2g20450 | Ribosomal protein L14 (RPL14A)                  | 5  | Intron 1 unspliced                 | NMD                   | x                                                                                                                                         |
| AtNo271  | At2g21250 | Mannose 6-phosphate reductase (NADPH-dependent) | 6  | Intron 3 unspliced                 | NMD                   | Intron retention of intron 5 - ASIP + NASC                                                                                                |
| AtNo156  | At2g21660 | Glycine-rich RNA-binding protein 7              | 2  | Cryptic 5' splice site in intron 1 | Only intron           | Three Alt 5'ss used in intron 1 (removing intron fragments of 309, 147 or 143 nt long) - ASIP; Intron retention of intron 2 - ASIP + NASC |
| AtNo064  | At2g24550 | Unknown protein                                 | 2  | Intron 1 unspliced                 | Only intron           | x                                                                                                                                         |
| AtNo190  | At2g32190 | Expressed protein                               | 3  | Intron 2 unspliced                 | Last intron unspliced | Intron retention of introns 1 and 2 - ASIP database                                                                                       |
| AtNo299  | At2g32190 | Expressed protein                               | 3  | Introns 1 and 2 unspliced          | NMD                   | Intron retention of introns 1 and - ASIP database                                                                                         |
| AtNo052  | At2g32200 | Hypothetical protein                            | 3  | Cryptic 3' splice site in intron 1 | In frame              | x                                                                                                                                         |
| AtNo300  | At2g32210 | Expressed protein                               | 3  | Intron 2 unspliced                 | Last intron unspliced | x                                                                                                                                         |
| AtNo1282 | At2g36530 | Enolase                                         | 12 | Intron 3 unspliced                 | NMD                   | x                                                                                                                                         |
| AtNo273  | At2g40095 | Expressed protein                               | 4  | Intron 3 unspliced                 | Last intron unspliced | x                                                                                                                                         |
| AtNo1382 | At2g43510 | Defensin-like/trypsin inhibitor                 | 2  | Intron 1 unspliced                 | Only intron           | x                                                                                                                                         |
| AtNo1449 | At2g45070 | Sec61 beta family protein                       | 2  | Intron 1 unspliced                 | Only intron           | Intron retention of intron 1 - ASIP database                                                                                              |
| AtNo168  | At2g45990 | Expressed protein                               | 9  | Intron 2 unspliced                 | NMD                   | Alt 3'ss in intron 7, alt 5'ss in intron 8 - ASIP database, intron retention of intron 7 - ASIP+NASC                                      |
| AtNo005  | At3g05500 | Rubber elongation factor                        | 3  | Intron 2 unspliced                 | Last intron unspliced | Intron retention of introns 1 and 2 - ASIP                                                                                                |

|          |           | (REF) family protein                                                                         |    |                                                                                    |                           | database                                                                                                     |
|----------|-----------|----------------------------------------------------------------------------------------------|----|------------------------------------------------------------------------------------|---------------------------|--------------------------------------------------------------------------------------------------------------|
| AtNo287  | At3g09640 | L-ascorbate peroxidase 1b                                                                    | 9  | Intron 1 unspliced                                                                 | NMD                       | x                                                                                                            |
| AtNo1402 | At3g11820 | Syntaxin 121 (SYP121)                                                                        | 2  | Cryptic intron spliced from exon 1                                                 | Only intron               | Intron retention of cryptic intron from exon1 - ASIP + NASC                                                  |
| AtNo275  | At3g16150 | L-asparaginase, putative / L-asparagine amidohydrolase                                       | 4  | Intron 3 unspliced                                                                 | Last intron unspliced     | Intron retention of intron 2 - ASIP database                                                                 |
| AtNo018  | At3g16990 | TENA/THI-4 family protein; seed maturation protein                                           | 3  | Sequence change in exon 1 (C instead of TT) causes frameshift in exon 1 giving PTC | NMD                       | x                                                                                                            |
| AtNo295  | At3g20270 | Lipid-binding serum glycoprotein                                                             | 11 | Cryptic 5' and 3' splice sites used in intron 1; intron 5 unspliced                | In frame                  | Exon Skipping of 21nt long exon 2 (in 5'UTR) - ASIP, Intron retention of intron 1 and intron 2 - ASIP + NASC |
| AtNo1298 | At3g27930 | Expressed protein                                                                            | 14 | Intron 4 unspliced                                                                 | NMD                       | x                                                                                                            |
| AtNo227  | At3g44300 | Nitrilase 2                                                                                  | 5  | Cryptic 70 nt intron removed from exon 4                                           | Frame change in last exon | x                                                                                                            |
| AtNo141  | At3g46010 | Actin-depolymerizing factor 1 (ADF1)                                                         | 3  | Intron 2 unspliced                                                                 | Last intron unspliced     | x                                                                                                            |
| AtNo108  | At3g51530 | F-box family protein                                                                         | 4  | Cryptic intron spliced from exon 2                                                 | NMD                       | x                                                                                                            |
| AtNo146  | At3g51730 | Saposin B-containing protein                                                                 | 6  | Intron 2 unspliced                                                                 | NMD                       | Intron retention of intron 5 - ASIP                                                                          |
| AtNo320  | At3g55170 | 60S ribosomal protein L35                                                                    | 4  | Intron 3 unspliced                                                                 | Last intron unspliced     | x                                                                                                            |
| AtNo170  | At3g55280 | 60S ribosomal protein L23A (RPL23aB)                                                         | 4  | Cryptic 3' splice site in exon 4                                                   | Frame change in last exon | x                                                                                                            |
| AtNo200  | At3g60180 | Uridinylate kinase                                                                           | 7  | Intron 5 unspliced                                                                 | NMD                       | x                                                                                                            |
| AtNo007  | At3g60210 | Chloroplast chaperonin 10                                                                    | 7  | Intron 5 unspliced                                                                 | NMD                       | x                                                                                                            |
| AtNo111  | At3g61860 | Arginine/serine-rich splicing factor RSp31                                                   | 6  | Cryptic 3'ss in intron 2                                                           | NMD                       | Alt 3'ss in intron 2 - ASIP database                                                                         |
| AtNo193  | At3g62190 | DNAJ heat shock N-terminal domain-containing protein                                         | 6  | Cryptic 3' splice site in intron 3                                                 | NMD                       | x                                                                                                            |
| AtNo1433 | At3g63520 | 9-cis-epoxycarotenoid dioxygenase / neoxanthin cleavage enzyme (NCED1) / carotenoid cleavage | 14 | Intron 5 unspliced                                                                 | NMD                       | Alt 3'ss in intron 12 - ASIP database                                                                        |

|          |           |                                                           |    |                                                                              |                       |                                                                                              |
|----------|-----------|-----------------------------------------------------------|----|------------------------------------------------------------------------------|-----------------------|----------------------------------------------------------------------------------------------|
|          |           | dioxygenase 1 (CCD1)                                      |    |                                                                              |                       |                                                                                              |
| AtNo307  | At4g01026 | Expressed protein                                         | 3  | Intron 2 unspliced                                                           | Last intron unspliced | x                                                                                            |
| AtNo1445 | At4g02430 | Pre-mRNA splicing factor SF2 (SR1 protein)                | 13 | Cryptic intron with part of intron 10 and exon 11; Cryptic 5'ss in intron 11 | NMD                   | Alt 3'ss in intron 8 and intron 10, intron retention of intron 10 - ASIP database            |
| AtNo297  | At4g03510 | zinc finger (C3HC4-type RING finger) family protein       | 3  | Intron 1 unspliced                                                           | NMD                   | Intron retention of intron 1 - ASIP + NASC database                                          |
| AtNo081  | At4g10730 | protein kinase                                            | 21 | Intron 1 unspliced                                                           | NMD                   | x                                                                                            |
| AtNo1443 | At4g21580 | Oxidoreductase, zinc-binding dehydrogenase family protein | 5  | Intron 3 unspliced                                                           | NMD                   | Intron retention of intron 1 - NASC database                                                 |
| AtNo072  | At4g23570 | Phosphatase-related                                       | 11 | Intron 1 unspliced                                                           | No effect             | Intron retention of intron 1 - ASIP + NASC database                                          |
| AtNo1285 | At4g28360 | Ribosomal protein L22 family                              | 6  | Intron 1 unspliced                                                           | NMD                   | x                                                                                            |
| AtNo1416 | At4g32530 | Vacuolar ATP synthase, putative                           | 4  | Intron 1 unspliced                                                           | NMD                   | x                                                                                            |
| AtNo026  | At4g36690 | U2 snRNP auxiliary factor large subunit, putative         | 13 | Introns 1 and 2 unspliced                                                    | NMD                   | Alt 3'ss in intron 11; intron retention of intron 11 - ASIP + NASC database                  |
| AtNo169  | At5g03360 | DC1 domain-containing protein                             | 8  | Introns 2 and 3 unspliced                                                    | NMD                   | x                                                                                            |
| AtNo1438 | At5g08790 | No apical meristem (NAM) family protein                   | 3  | intron 1 unspliced                                                           | NMD                   | Intron retention of intron 2 - ASIP database                                                 |
| AtNo310  | At5g09880 | RNA recognition motif (RRM)-containing protein            | 13 | Cryptic 5' splice site in intron 4                                           | NMD                   | x                                                                                            |
| AtNo232  | At5g11330 | Monooxygenase family protein                              | 4  | Cryptic intron removed from exon 2, intron 2 unspliced                       | NMD                   | Cryptic intron (170nt) removed from exon 2, Intron retention of intron 2 and intron 3 - ASIP |
| AtNo270  | At5g11840 | Putative protein                                          | 4  | Cryptic 5' splice site in intron 1                                           | In frame              | x                                                                                            |
| AtNo104  | At5g19440 | Cinnamyl-alcohol dehydrogenase-like protein (CAD)         | 6  | Introns 1, 4 and 5 unspliced                                                 | NMD                   | x                                                                                            |
| AtNo306  | At5g21940 | Expressed protein                                         | 2  | intron 1 unspliced                                                           | Only intron           | Intron retention of intron 1 - ASIP                                                          |



|                                |           |                                                    |    |                                                                                                  |                       |                                                |
|--------------------------------|-----------|----------------------------------------------------|----|--------------------------------------------------------------------------------------------------|-----------------------|------------------------------------------------|
| AtNo1332                       | At5g25770 | Expressed protein                                  | 13 | Intron 5 unspliced                                                                               | NMD                   | Intron retention of intron 2,5,6 and 12 - ASIP |
| AtNo105                        | At5g27170 | Hypothetical protein                               | 2  | Intron unspliced                                                                                 | Only intron           | x                                              |
| AtNo090                        | At5g27700 | 40S ribosomal protein S21 (RPS21C)                 | 4  | Introns 1 and 2 unspliced                                                                        | NMD                   | x                                              |
| AtNo294                        | At5g37260 | Myb family transcription factor                    | 5  | Intron 1 unspliced                                                                               | NMD                   | x                                              |
| AtNo053                        | At5g41910 | RNA polymerase II mediator complex protein-related | 6  | Intron 1 unspliced                                                                               | NMD                   | x                                              |
| AtNo043                        | At5g42790 | 20S proteasome alpha subunit F1 (PAF1)             | 2  | PTC in exon (putative transcriptional error)                                                     | NMD                   | x                                              |
| AtNo315                        | At5g45550 | Mob1/phocein family protein                        | 7  | intron 5 unspliced                                                                               | NMD                   | x                                              |
| AtNo106                        | At5g53940 | Yippee family protein/zinc-binding protein         | 5  | Intron 4 unspliced                                                                               | Last intron unspliced | x                                              |
| AtNo1300                       | At5g59300 | Ubiquitin-conjugating enzyme 7                     | 6  | Intron 5 unspliced; Cryptic 5'ss in exon 1 and cryptic 3'ss in intron 1 removes a cryptic intron | NMD                   | x                                              |
| AtNo211                        | At5g59800 | Methyl-CpG-binding domain-containing protein       | 6  | Intron 2 unspliced                                                                               | NMD                   | Intron retention of intron 2 - ASIP database   |
| AtNo036                        | At5g64905 | Expressed protein                                  | 1  | PTC in exon (putative transcriptional error)                                                     | NMD                   | x                                              |
| <b>Nucleolar partial cDNAs</b> |           |                                                    |    |                                                                                                  |                       |                                                |
| AtNo235                        | At1g07590 | Pentatricopeptide(PPR) repeat-containing           | 3  | Intron 1 unspliced                                                                               | NMD                   | Intron retention of intron 1 - ASIP            |
| AtNo178                        | At1g48280 | Hydroxyproline-rich glycoprotein family protein    | 7  | Intron 6 unspliced                                                                               | Last intron unspliced | x                                              |
| AtNo191                        | At1g49870 | Expressed protein; no hits to Blast X              | 5  | Intron 1 unspliced                                                                               | NMD                   | x                                              |
| AtNo319                        | At1g49980 | UMUC-like DNA repair family protein                | 14 | Intron 12 unspliced                                                                              | NMD                   | x                                              |
| AtNo220                        | At1g51430 | Expressed protein                                  | 7  | Introns 1 and 2 unspliced                                                                        | NMD                   | x                                              |

|                                  |           |                                                           |    |                                                                |                       |                                                                              |
|----------------------------------|-----------|-----------------------------------------------------------|----|----------------------------------------------------------------|-----------------------|------------------------------------------------------------------------------|
| AtNo201                          | At1g64625 | bHLH transcription factor                                 | 8  | Exon skipping of exon 4; cryptic 3' splice site in exon 5      | NMD                   | x                                                                            |
| AtNo013                          | At1g66330 | Senescence-associated family protein                      | 13 | Intron 9 unspliced                                             | NMD                   | Intron retention of intron 5 - ASIP                                          |
| AtNo1403                         | At4g02195 | Syntaxin 42 (SYP42)                                       | 8  | Intron 4 unspliced                                             | NMD                   | x                                                                            |
| AtNo1331                         | At4g02195 | Syntaxin 42 (SYP42)                                       | 8  | Intron 4 unspliced                                             | NMD                   | x                                                                            |
| AtNo1342                         | At5g09390 | CD2-binding protein                                       | 9  | Intron 8 unspliced                                             | Last intron unspliced | Intron retention of intron 5 - ASIP, Alt 3'ss in intron 8 used - ASIP + NASC |
| AtNo                             | At5g09790 | PHD finger family protein / SET domain-containing protein | 5  | Intron 3 unspliced; cryptic 5' and 3' splice sites in intron 1 | NMD                   | Exon skipping of exon2; Alt3'ss used in intron 3 - ASIP                      |
| AtNo046                          | At5g12280 | Hypothetical protein (similar to splicing factor SWAP)    | 5  | Intron 4 unspliced                                             | Last intron unspliced | x                                                                            |
| AtNo016                          | At5g15030 | Paired amphipathic helix repeat-containing protein        | 7  | Introns 3 and 4 unspliced                                      | NMD                   | x                                                                            |
| <b>Nuclear full-length cDNAs</b> |           |                                                           |    |                                                                |                       |                                                                              |
| AtNu1276                         | At1g01100 | 60S acidic ribosomal protein P1 (RPP1A)                   | 4  | Cryptic 5'ss in intron 1 (5' UTR)                              | No effect             | Alt 5'ss in intron 1 used - NASC database                                    |
| AtNu1114                         | At1g43160 | AP2 domain-containing protein                             | 2  | Intron 1 unspliced                                             | Only intron           | x                                                                            |
| AtNu1002                         | At1g65980 | peroxiredoxin type 2                                      | 3  | Intron 1 unspliced                                             | NMD                   | Intron retention of intron 3 - NASC database                                 |
| AtNu1129                         | At1g80920 | DNA J heat shock N-terminal domain-containing protein     | 3  | Intron 1 unspliced                                             | NMD                   | x                                                                            |
| AtNu1035                         | At2g21195 | Expressed protein                                         | 4  | Intron 1 unspliced                                             | NMD                   | Intron retention of intron 1 and intron 3 - ASIP + NASC database             |
| AtNu1224                         | At2g32060 | 40S ribosomal protein S12 (RPS12C)                        | 5  | Cryptic 5'ss in intron 1 (5' UTR)                              | No effect             | Alt 5'ss used in intron 1 - NASC + ASIP database                             |
| AtNu1235                         | At2g45360 | Expressed protein                                         | 2  | Intron 1 unspliced                                             | Only intron           | x                                                                            |
| AtNu1375                         | At2g46390 | Expressed protein                                         | 2  | Intron unspliced                                               | Only intron           | x                                                                            |
| AtNu1291                         | At3g24830 | 60S ribosomal protein L13A (RPL13aB)                      | 4  | Intron 2 unspliced                                             | NMD                   | x                                                                            |

|          |           |                                         |   |                                                                                                     |             |                                                                             |
|----------|-----------|-----------------------------------------|---|-----------------------------------------------------------------------------------------------------|-------------|-----------------------------------------------------------------------------|
| AtNu1927 | At3g46460 | ubiquitin-conjugating enzyme 13 (UBC13) | 6 | Cryptic 5'ss in intron 4, leaving 19 nt                                                             | NMD         | x                                                                           |
| AtNu1323 | At3g53420 | Plasma membrane intrinsic protein 2A    | 4 | Intron 3 unspliced                                                                                  | Last intron | x                                                                           |
| AtNu1246 | At3g53470 | Expressed protein ribosomal protein S25 | 2 | Intron unspliced                                                                                    | Only intron | Alt 3'ss used in intron 1 - ASIP + NASC                                     |
| AtNu1357 | At4g05640 | Hypothetical protein                    | 2 | Intron unspliced                                                                                    | Only intron | x                                                                           |
| AtNu1145 | At5g18800 | NADH-ubiquinone oxidoreductase 19 kDa   | 3 | Cryptic 3'ss used in intron 1 (5' UTR)                                                              | No effect   | Alt 3'ss used in intron 1 - ASIP + NASC                                     |
| AtNu1137 | At5g22875 | Expressed protein                       | 3 | Cryptic 5'ss in intron 1 (5' UTR)                                                                   | No effect   | Intron retention of intron 1 - ASIP, Alt5'ss used in intron 1 - NASC        |
| AtNu1380 | At5g45420 | Myb family transcription factor         | 2 | Cryptic 5'ss in intron 1                                                                            | Only intron | x                                                                           |
| AtNu1207 | At5g57790 | Unknown protein                         | 3 | Introns 1 and intron 2 unspliced                                                                    | NMD         | Intron retention of introns 1, 2 and 3 - ASIP, (and NASC for intron 3 only) |
| AtNu76   | At5g59770 | Expressed protein                       | 6 | Multiple cryptic splice sites used in intron 5 leaving 3 different fragments of 72nt, 49nt and 98nt | NMD         | x                                                                           |

### Nuclear Partial cDNAs

|          |           |                                        |    |                     |             |                                     |
|----------|-----------|----------------------------------------|----|---------------------|-------------|-------------------------------------|
| AtNu1118 | At3g59660 | C2 domain-containing protein           | 18 | Intron 16 unspliced | NMD         | x                                   |
| AtNu1052 | At3g60300 | RWD domain-containing protein          | 4  | Intron 1 unspliced  | NMD         | Alt 3'ss used in intron 3 - ASIP    |
| AtNu1008 | At5g14550 | Expressed protein                      | 11 | Intron 10 unspliced | Last intron | Intron retention of intron 9 - ASIP |
| AtNu1236 | At5g26610 | D111/G-patch domain-containing protein | 8  | Intron 4 unspliced  | NMD         | Intron retention of intron 4 - ASIP |

### Whole cell full-length cDNAs

|          |           |                               |   |                                           |             |   |
|----------|-----------|-------------------------------|---|-------------------------------------------|-------------|---|
| AtWC248  | At2g03570 | Hypothetical protein          | 2 | Cryptic 5' and 3'splice sites in intron 1 | Only intron | x |
| AtWC1491 | At5g16970 | NADP-dependent oxidoreductase | 5 | Intron 1 unspliced                        | NMD         | x |

|                                 |           |                                                 |    |                                     |             |                                                                   |
|---------------------------------|-----------|-------------------------------------------------|----|-------------------------------------|-------------|-------------------------------------------------------------------|
| AtWC<br>1429                    | At1g70900 | Expressed protein                               | 7  | Intron 1 unspliced                  | NMD         | x                                                                 |
| <b>Whole cell partial cDNAs</b> |           |                                                 |    |                                     |             |                                                                   |
| AtWC<br>1423                    | At5g41060 | zinc finger (DHHC type)<br>family protein       | 5  | Cryptic 5' and 3' ss<br>in intron 1 | NMD         | x                                                                 |
| AtWC<br>1468                    | At1g58025 | DNA-binding bromodomain-<br>containing protein  | 10 | Intron 9 unspliced                  | Last intron | x                                                                 |
| AtWC252                         | At2g15580 | zinc finger (C3HC4-type<br>RING finger) protein | 3  | Intron 2 unspliced                  | Last intron | Alt 3'ss used in intron 2, intron retention<br>of intron 2 - ASIP |

**Supplemental Table 2.** Primers used in RT-PCR reactions.

| <b>Gene Identifier</b>                   | <b>Protein name</b>                | <b>Accession Numbers</b> | <b>Forward primer</b>      | <b>Reverse primer</b>     |
|------------------------------------------|------------------------------------|--------------------------|----------------------------|---------------------------|
| <b>Nucleolar-nucleoplasmic fractions</b> |                                    |                          |                            |                           |
| At4g16190                                | Cysteine protease                  | NM_117715                | ATGGATCGTGTGGTCTTCTTCTT    | CTTGGGTGAGGTATGAACAGCA    |
| At4g35750                                | Rho-GTPase-activating protein-like | NM_119741                | ATGAGTTCTCAGATTTCCGGAGATT  | TGAGATACACCTCATGGAGAACTT  |
| At5g13080                                | WRKY75                             | NM_121311                | ATGGAGGGATATGATAATGGGT     | GAAAGAAGAGTAGATTTGCATTTGA |
| At4g39090                                | Cysteine proteinase                | NM_120069                | ATGGATCGTCTTAAGCTTTATTTCT  | ATGGGCGGTGGTTGAGACGGTGGC  |
| At1g31340                                | Ubiquitin-related protein          | NM_102873                | ATGCAGATCTTCGTCAAAACCCT    | GAGAAGACCAAACCACCCCTAA    |
| At3g61860                                | SR protein, RSp31                  | NM_116051                | ATGAGGCCAGTGTTCTCGCGCA     | AGGTCTTCCTCTTGGGACTGGA    |
| At4g29510                                | Arginine methyltransferase         | NM_119096                | ATGACTAAGAACAGTAACCACGACGA | ACGCATTTTGTAGTGTGGGTCT    |
| At4g34135                                | Flavonol 7-O-glucosyl-transferase  | NM_179161                | AGTGCATAAACCACAGAAGAGA     | GCTTGGTGGTCAAGTATCAGCA    |
| At5g10980                                | Histone H3                         | NM_121136                | ATGGCTCGTACCAAGCAAACCG     | AGCACGTTCTCCACGAATTCTT    |
| At2g21660                                | Glycine-rich protein 7             | NM_179686                | ATGGCGTCCGGTGATGTTGAGT     | TTCCTCCGTAACCTCCTCCTT     |
| At2g45670                                | Calcineurin B subunit-related      | NM_130129                | GTGAATAGATTCTCACAGACAT     | GAACTTCCCATTAGTCGTGGT     |
| <b>PCR Cycle number analysis</b>         |                                    |                          |                            |                           |
| At1g04400                                | Blue light receptor                | NM_116961                | GGAAGAAAGAAGAGTCAAG        | GGATTATCCTCAATCCTTAGG     |
| At1g09140                                | SR protein, SRP30                  | NM_148447                | CCTGCTAGATCCATTTCCCC       | GATCTTGATCTTGATTTTG       |
| At1g10590                                | DNA-binding protein-related        | NM_179301                | CGCCTCCACAGATCTAATCGC      | CCATCTTCGTGTTGACAAC       |
| At3g53270                                | Unknown protein                    | NM_115187                | CCAACATCATCATCTTCTC        | CCACAAACTCGTCTATCAGC      |
| At3g57520                                | Seed imbibition 2                  | NM_202722                | GGTGGTAAGACTACCTAAAGG      | GGTTATCGCTGAGCGCGGGAG     |
| At4g20380                                | Lesion simulating disease 1        | NM_179218                | GTCTATCTCCTCAATTTGG        | GCACATTAGATGCTCCTTAGG     |
| At5g09230                                | Histone deacetylase, SRT2          | NM_203025                | CATCCGCCATTAACGACCTC       | CTCACAAACCGTCTGCATCC      |
| At2g39730                                | Rubisco activase                   | NM_179989                | CCTCCCGTGTTCCGAGCAACCC     | CCGTTGGATCAAAGTTTTTCAGCC  |
| At5g20250                                | Glycosyl hydrolase family 36       | NM_122032                | CCATTCAAATCTCACATTCCC      | CCCGTCGAAATACGAACCGCC     |
| At5g35680                                | eIF-1A                             | NM_180764                | CCTAATCACTTTCAACAACCTC     | CCGTCAATGCACATAACGTC      |
| At5g41150                                | RAD1                               | NM_123480                | CCATCCTGACATGGGTTTTGTG     | CCAGTTCTTTCTTCCGCCTGC     |
| At5g45510                                | ATP binding protein                | NM_123919                | GGAGAAAGTTGTTGTAGGAG       | GGTGGAGGTACATCACTGTGG     |
| At5g65050                                | Agamous-like MADS-box protein 31   | NM_125904                | CAAAGATCATTGATCGTTAC       | CTTCACTTCCCCCATCATTAGTTC  |
| At5g46800                                | A bout de soufflé                  | NM_124051                | CTGGTTTCGCTGTTTCGTTCC      | CTACATCCATTGGTCCACC       |
| At1g23970                                | Unknown protein                    | NM_179371                | CTTGACATGATCCCGATCC        | CCATCGCCCAATGCGCCACC      |

|           |                                                           |           |                         |                        |
|-----------|-----------------------------------------------------------|-----------|-------------------------|------------------------|
| At1g54360 | TBP-associated factor TAF6                                | NM_202295 | CCTTCCATTCCACAGAATTC    | CCAGATTGAGTCAAAGCCCAC  |
| At2g04790 | Unknown protein                                           | NM_201690 | CCCTGAAAGCATAGAAGCAGC   | CCCATGACTTATTAAACTCC   |
| At2g36000 | Mitochondrial transcription<br>termination factor-related | NM_179927 | CTCGTTTAGTTTGGAGAATC    | CTTCATCAGCATTTCATTAC   |
| At4g35450 | Ankyrin repeat-containing protein 2                       | NM_119710 | CCACCACAACATTGTCTTTTC   | CCAGCGTTAGGAATAGATCTC  |
| At4g38510 | Vacuolar ATP synthase subunit B                           | NM_202978 | CCTCTACACAGATCTTTGGATTC | CTTGACCACGTCGGGTAGTTCC |
| At4g39260 | Glycine-rich protein 8                                    | NM_179192 | GGTGCTTTGTCGGCGGCCTTG   | GGCTTTCTCGTCCTTGAAGG   |
